# Supplementary material for: Innovative Cultivation Practices for Reducing Nitrate Content in Baby Leaf Lettuce Grown in a Vertical Farm
Source: MDPI journal article supplement (doi:10.3390/horticulturae10040375), 2024-04-08
Supplement: s1 [file s1]

**Table S1.** Required amounts of fertilizers for the preparation of stock solutions A and B for the two nutrient solution treatments.

| EC <sub>2.5</sub> N <sub>15</sub>    |           |                    | EC <sub>1.5</sub> N <sub>5</sub>     |           |                    |
|--------------------------------------|-----------|--------------------|--------------------------------------|-----------|--------------------|
| Target EC for the fertigation system | 2.50      | dS m <sup>-1</sup> | Target EC for the fertigation system | 1.50      | dS m <sup>-1</sup> |
| Target pH fertigation system         | 5.3       |                    | Target pH fertigation system         | 5.6       |                    |
| <b>Stock solution A</b>              | <b>10</b> | <b>LITERS</b>      | <b>Stock solution A</b>              | <b>10</b> | <b>LITERS</b>      |
| Calcium nitrate                      | 1.132     | Kg                 | Calcium nitrate                      | 0.480     | Kg                 |
| Calcium chloride (48% Cl)            | 0.296     | Kg                 | Calcium chloride (48% Cl)            | 0.296     | Kg                 |
| Ammonium nitrate                     | 0.029     | Kg                 | Ammonium nitrate                     | 0.000     | Kg                 |
| Fe-EDDHA (6% Fe)                     | 0.037     | Kg                 | Fe-EDDHA (6% Fe)                     | 0.037     | Kg                 |
| <b>Stock solution B</b>              | <b>10</b> | <b>LITERS</b>      | <b>Stock solution B</b>              | <b>10</b> | <b>LITERS</b>      |
| Potassium nitrate                    | 0.245     | Kg                 | Potassium nitrate                    | 0.000     | Kg                 |
| Magnesium sulphate                   | 0.387     | Kg                 | Magnesium sulphate                   | 0.227     | Kg                 |
| Monopotassium phosphate              | 0.163     | Kg                 | Monopotassium phosphate              | 0.163     | Kg                 |
| Potassium sulphate                   | 0.249     | Kg                 | Potassium sulphate                   | 0.226     | Kg                 |
| Ammonium sulphate                    | 0.000     | Kg                 | Ammonium sulphate                    | 0.004     | Kg                 |
| Manganese sulphate                   | 0.9       | g                  | Manganese sulphate                   | 0.9       | g                  |
| Zinc sulphate                        | 1.4       | g                  | Zinc sulphate                        | 1.4       | g                  |
| Copper sulphate                      | 0.2       | g                  | Copper sulphate                      | 0.2       | g                  |
| Boric acid                           | 2.5       | g                  | Boric acid                           | 2.5       | g                  |
| Ammonium heptamolybdate              | 0.1       | g                  | Ammonium heptamolybdate              | 0.1       | g                  |

The stock solutions A and B were designed with a dilution rate 1:100
